# Supplementary material for: Temporal trends and patterns in heart failure incidence: a population-based study of 4 million individuals
Source: PubMed Central journal article supplement (PMC5814791; doi:10.1016/s0140-6736(17)32520-5), 2018-02-10
Supplement: mmc1.pdf [file mmc1.pdf]

# THE LANCET

## Supplementary appendix

This appendix formed part of the original submission and has been peer reviewed. We post it as supplied by the authors.

Supplement to: Conrad N, Judge A, Tran J, et al. Temporal trends and patterns in heart failure incidence: a population-based study of 4 million individuals. *Lancet* 2017; published online Nov 21. [http://dx.doi.org/10.1016/S0140-6736\(17\)32520-5](http://dx.doi.org/10.1016/S0140-6736(17)32520-5).

## **Temporal trends and patterns in heart failure incidence: a population-based study of 4 million individuals**

### **Supplementary Material**

|                                                                                                             |    |
|-------------------------------------------------------------------------------------------------------------|----|
| Text S1: Index of Multiple Deprivation.....                                                                 | 2  |
| Text S2: Regional variation in heart failure incidence.....                                                 | 3  |
| Text S3: Validity of diagnoses recorded in electronic health record databases.....                          | 4  |
| Table S1: Selected studies reporting heart failure incidence in the general population. ....                | 5  |
| Table S2: Clinical codes used to identify patients with heart failure. ....                                 | 7  |
| Table S3: Clinical codes used to exclude first heart failure diagnoses not referring to an acute event..... | 10 |
| Figure S1: Overall and age-stratified heart failure prevalence in 2002 versus 2014.....                     | 12 |
| Figure S2: Overall and age-stratified heart failure incidence for women and men. ....                       | 13 |
| Figure S3: Age-sex-standardised heart failure incidence in England by regions in 2002 and 2014 .....        | 14 |

### **Text S1: Index of Multiple Deprivation**

Index of Multiple Deprivation (IMD) scores are the most commonly used measure of socio-economic levels in the UK and have been widely used in healthcare research.<sup>1-4</sup> The overall index covers seven dimensions of deprivation including income, employment, education, health, crime, housing, living environment.<sup>1,5</sup> IMD is a broad measure that may further correlate with non-socio-economic factors including environmental, behavioural and biological factors. While social heterogeneity is inevitably present in small neighbourhoods, the small area boundaries remain fixed over time allowing consistent comparisons of temporal trends, and the small mean population improves the population homogeneity compared with other measures of neighbourhood deprivation.<sup>1,5</sup>

### **References**

1. Department for Communities and Local Government (DCLG). The English Index of Multiple Deprivation 2015: Guidance [Internet]. 2015 [cited 2017 Feb 8]. Available from: <https://www.gov.uk/government/statistics/english-indices-of-deprivation-2015>
2. Newton JN, Briggs ADM, Murray CJL, et al. Changes in health in England, with analysis by English regions and areas of deprivation, 1990–2013: a systematic analysis for the Global Burden of Disease Study 2013. *Lancet* 2015;386(10010):2257–74.
3. Ramsay SE, Morris RW, Whincup PH, et al. The influence of neighbourhood-level socioeconomic deprivation on cardiovascular disease mortality in older age: longitudinal multilevel analyses from a cohort of older British men. *J Epidemiol Community Health* [Internet] 2015;69(12):1224–31. Available from: <http://jech.bmj.com/content/early/2015/08/18/jech-2015-205542.full>
4. Adams J, White M. Removing the health domain from the Index of Multiple Deprivation 2004--effect on measured inequalities in census measure of health. *J Public Health (Bangkok)* [Internet] 2006 [cited 2017 Jul 20];28(4):379–83. Available from: <https://academic.oup.com/jpubhealth/article-lookup/doi/10.1093/pubmed/fdl061>
5. Hawkins NM, Scholes S, Bajekal M, et al. Community care in England: reducing socioeconomic inequalities in heart failure. *Circulation* 2012;126(9):1050–7.

## Text S2: Regional variation in heart failure incidence

Little is known about regional variation in heart failure incidence in England, and how it has evolved over time. In supplementary analyses, we investigated how incidence rates varied by region and time.

Region is recorded at practice level by Clinical Practice Research Datalink (CPRD), and reflects the former geographical division of the National Health Service in 10 Strategic Health Authorities in England. These correspond to administrative regions, except that the large South East England region is divided into two: South Central and South East Coast.<sup>6</sup>

We observed substantial regional variation in heart failure incidence rates even after adjusting for age, sex, and socio-economic differences. Age-sex-standardised incidence rates ranged from 268 per 100,000 patient-years in the 'South East Coast' region to 393 per 100,000 patient-years in the 'North West' region (incidence rate ratio (IRR) 1.35, [1.32,1.38]). However, these overall regional differences attenuated over the study period, so that IRR between the highest and lowest incidence regions decreased from 1.44 [1.31,1.58] in 2002 to 1.26 [1.15,1.38] in 2014. Regions with highest heart failure incidence rates were those located in the North of England (North West, East Midlands, North East, Yorkshire and the Humber, West Midlands) (**Figure S3**).

The English 'North-South' inequality in health has been widely reported,<sup>7-9</sup> with cardiovascular diseases as the largest factor behind health inequalities.<sup>2,10</sup> Previous studies have also shown inequalities to remain persistent after adjustment for socio-economic deprivation<sup>9</sup> and only partly explained by common cardiovascular risk factors such as systolic blood pressure, body mass index, or smoking<sup>11</sup>. Many other factors might plausibly explain the excess heart failure incidence in the north of England. These include concomitant medical conditions and their treatments (eg. respiratory diseases, depression, musculoskeletal affections, or infections) often linked to environmental (eg. working conditions or air pollution) and lifestyle (eg. diet or drug prescription habits) factors. Observed disparities offer potential opportunities to design more targeted and equitable prevention strategies, and suggest that prevention measures in England may need to prioritize northern regions to reduce inequalities. Further research is needed to understand the determinants of geographical disparities.

## References

6. National Health Service. Strategic Health Authority Configurations [Internet]. 2006 [cited 2017 Feb 28]. Available from: <http://www.nhshistory.net/MapofSHAsFeb09.pdf>
7. Hacking JM, Muller S, Buchan IE. Trends in mortality from 1965 to 2008 across the English north-south divide: comparative observational study. *BMJ* 2011;342.
8. Law MR, Morris JK. Why is mortality higher in poorer areas and in more northern areas of England and Wales? *J Epidemiol Community Heal* 1998;(52):344–352.
9. Siegler V, Langford A, Johnson B. Regional differences in male mortality inequalities using the National Statistics Socio-Economic Classification, England and Wales, 2001–03 [Internet]. 2008 [cited 2017 Jul 21]. Available from: <http://www.eurohex.eu/bibliography/pdf/Smith-HSQ-2008-2561717250/Smith-HSQ-2008.pdf#page=6>
10. McFadden E, Luben R, Wareham N, Bingham S, Khaw K-T. Occupational social class, educational level, smoking and body mass index, and cause-specific mortality in men and women: a prospective study in the European Prospective Investigation of Cancer and Nutrition in Norfolk (EPIC-Norfolk) cohort. *Eur J Epidemiol* [Internet] 2008 [cited 2017 Jul 26];23(8):511–22. Available from: <http://link.springer.com/10.1007/s10654-008-9267-x>
11. Kumar R, Dalton AR. The English North-South divide: risk factors for cardiovascular disease accounting for cross-sectional socio-economic position. *Perspect Public Health* [Internet] 2014 [cited 2017 Jul 21];134(6):339–45. Available from: <http://journals.sagepub.com/doi/10.1177/1757913913493236>

### **Text S3:** Validity of diagnoses recorded in electronic health record databases

Research using electronic health records databases is reliant on the accuracy of clinical coding input by physicians in primary care, as part of a consultation, or secondary care, as part of a hospital admission. The validity of diagnoses underlying our study has therefore been carefully assessed and was considered appropriate in light of the following arguments.

**Independent validation studies.** Three studies are of major importance: (i) a systematic review, published in 2010, reports 212 validation studies over a broad range of conditions with an average positive predictive value of 89%<sup>12</sup>; (ii) a study specifically investigating heart failure diagnoses, which despite it being conducted before the introduction of national care monitoring programmes reports a positive predictive value of 82%<sup>13</sup>; and (iii) a more recent study investigating the validity of chronic obstructive pulmonary disease (COPD), another major chronic condition managed in primary care, which reports an accuracy of 87% compared with specialist assessment.<sup>14</sup>

**National care monitoring programmes.** Two national clinical audit programmes (in particular the 'quality and outcomes framework' (QOF) introduced in 2004 for primary care, and the 'national heart failure audit' (NHFA) introduced in 2007 for secondary care) ensure a stable quality of clinical coding practices and provide a solid support for the validity of recorded diagnoses. Indeed, these report that approximately 90% of recorded heart failure diagnoses in England are referred for echocardiography, specialist assessment, or B-type natriuretic peptide (BNP) measurement.<sup>15,16</sup>

**Clinical guidelines.** Guidelines for the diagnosis and management of heart failure from the National Institute for Clinical Excellence (NICE)<sup>17,18</sup> provide additional consistency over the study period. Indeed, guidelines are largely consistent in regard to heart failure diagnostic criteria and recommended investigations. One important change is the availability of natriuretic peptides testing and the variability in assay accuracy; these are however mainly used to exclude suspected cases, as opposed to confirming diagnoses, and therefore unlikely to impact disease incidence rates.<sup>17,18</sup>

**Sensitivity analyses.** Finally, to confirm the validity of heart failure cases included in our cohort, we performed the following sensitivity analyses. (a) case identification restricted to diagnostic codes included in national care monitoring programmes. While for our main analysis we intentionally expanded the diagnostic codes from the national audit programmes list with additional codes indicating a heart failure diagnosis, so as to ensure completeness; sensitivity analyses, restricting diagnostic codes to those used in the national audit programmes, found that 97% of patients in our cohort had a record heart failure used in the national clinical audit programmes, and led to no significant changes in the present results. (b) case identification restricted to diagnoses recorded in secondary care, or referred for specialist assessment or echocardiography. We further found that 92% of patients included in our cohort had a heart failure diagnosis recorded in secondary care, or either a referral to specialist cardiology service or echocardiography. While that proportion moderately increased over time, we found no significant change by sex or socio-economic status.

### **References:**

12. Herrett E, Thomas SL, Schoonen WM, Smeeth L, Hall AJ. Validation and validity of diagnoses in the General Practice Research Database: a systematic review. *Br J Clin Pharmacol* 2010;69(1):4–14.
13. Johansson S, Wallander M-A, Ruigómez A, Rodríguez LAG. Incidence of newly diagnosed heart failure in UK general practice. *Eur J Heart Fail* 2001;3(2):225–31.
14. Quint JK, Müllerova H, DiSantostefano RL, et al. Validation of chronic obstructive pulmonary disease recording in the Clinical Practice Research Datalink (CPRD-GOLD). *BMJ Open* 2014;4(7):e005540.
15. Primary Care Domain ND. Quality and Outcomes Framework Report, England 2015-16 [Internet]. 2016 [cited 2017 Feb 27]. Available from: <http://content.digital.nhs.uk/qof>
16. Mitchell P, Marle D, Donkor A, et al. National Heart Failure Audit 2013-2014 [Internet]. 2015 [cited 2016 Oct 12]. Available from: <https://www.ucl.ac.uk/nicor/audits/heartfailure/documents/annualreports/hfannual13-14-updated.pdf>
17. National Institute for Clinical Excellence (NICE). Management of chronic heart failure in adults in primary and secondary care. Clinical Guideline 5. 2003.
18. National Institute for Health and Clinical Excellence (NICE). Chronic heart failure: management of chronic heart failure in adults in primary and secondary care (CG108) [Internet]. 2010. Available from: <http://guidance.nice.org.uk/CG108/Guidance>

**Table S1:** Selected studies reporting heart failure incidence in the general population.

| Study                                      | Country | Time Period | Population         | Size               | Design                            | Case Identification                                                                                                                                          | Case Definition                                                        | Reported Incidence Rate/100,000 Person-years |               |               | Comments                                                                                                                                                                                                                     |
|--------------------------------------------|---------|-------------|--------------------|--------------------|-----------------------------------|--------------------------------------------------------------------------------------------------------------------------------------------------------------|------------------------------------------------------------------------|----------------------------------------------|---------------|---------------|------------------------------------------------------------------------------------------------------------------------------------------------------------------------------------------------------------------------------|
|                                            |         |             |                    |                    |                                   |                                                                                                                                                              |                                                                        | All (Trend)                                  | Men (Trend)   | Women (Trend) |                                                                                                                                                                                                                              |
| Levy 2002 (Framingham) <sup>19</sup>       | USA     | 1950–1969   | General Population | 10,311 subjects    | Prospective cohort                | Population based screening, including physical examination, electrocardiography, and review of hospital records, physicians' records, and pathology reports. | Framingham heart failure diagnosis criteria                            | -                                            | 627           | 420           | The study uses a prospectively collected population cohort and validated diagnoses. The number of cases is comparatively small.                                                                                              |
|                                            |         | 1970–1979   |                    |                    |                                   |                                                                                                                                                              |                                                                        |                                              | 563 (↔)       | 311 (↓)       |                                                                                                                                                                                                                              |
|                                            |         | 1980–1989   |                    |                    |                                   |                                                                                                                                                              |                                                                        |                                              | 536 (↔)       | 298 (↓)       |                                                                                                                                                                                                                              |
|                                            |         | 1990–1999   |                    |                    |                                   |                                                                                                                                                              |                                                                        |                                              | 564 (↔)       | 327 (↓)       |                                                                                                                                                                                                                              |
| Roger 2004 (Olmsted County) <sup>20</sup>  | USA     | 1979-1984   | General Population | 4,537 HF cases     | Prospective cohort                | Outpatient and hospital discharge records                                                                                                                    | Clinical diagnosis codes, validated by Framingham criteria on a subset | -                                            | 360           | 284           | The study uses a county-wide cohort and partly validated diagnoses. The number of cases is comparatively small.                                                                                                              |
|                                            |         | 1985-1990   |                    |                    |                                   |                                                                                                                                                              |                                                                        |                                              | 390 (↔)       | 292 (↔)       |                                                                                                                                                                                                                              |
|                                            |         | 1991-1995   |                    |                    |                                   |                                                                                                                                                              |                                                                        |                                              | 375 (↔)       | 260 (↔)       |                                                                                                                                                                                                                              |
|                                            |         | 1996-2000   |                    |                    |                                   |                                                                                                                                                              |                                                                        |                                              | 383 (↔)       | 315 (↔)       |                                                                                                                                                                                                                              |
| Gerber 2015 (Olmsted County) <sup>21</sup> | USA     | 2000        | General Population | 2,762 HF cases     | Prospective cohort                | Outpatient and hospital discharge records                                                                                                                    | Clinical diagnosis codes, validated by Framingham criteria on a subset | 316                                          | Graphical (↓) | Graphical (↓) | The study uses a county-wide cohort, partly validated diagnoses, and distinguishes between HF-REF/HF-PEF. The number of cases is comparatively small.                                                                        |
|                                            |         | 2010        |                    |                    |                                   |                                                                                                                                                              |                                                                        | 219 (↓)                                      |               |               |                                                                                                                                                                                                                              |
| Ezekowitz 2011 (Canada) <sup>22</sup>      | Canada  | 2000        | General Population | 82,323 HF cases    | Retrospective longitudinal cohort | GP, specialist, and hospital discharge records                                                                                                               | Clinical diagnosis codes                                               | 538                                          | -             | -             | The study focuses on incidence trends by place of diagnosis (e.g. emergency department vs. outpatient). Incidence rates are not stratified by sex or age-group.                                                              |
|                                            |         | 2006        |                    |                    |                                   |                                                                                                                                                              |                                                                        | 403 (↓)                                      |               |               |                                                                                                                                                                                                                              |
| Zarrinkoub 2013 (Sweden) <sup>23</sup>     | Sweden  | 2006        | General Population | 2,056,173 subjects | Retrospective longitudinal cohort | GP, specialist, and hospital discharge records                                                                                                               | Clinical diagnosis codes                                               | -                                            | 390           | 360           | The study presents incidence rates and trends by sex and age group in a large general population cohort. Considerations for changes in the denominator size over time and their impact on incidence rates are not presented. |
|                                            |         | 2010        |                    |                    |                                   |                                                                                                                                                              |                                                                        |                                              | 290 (↓)       | 290 (↓)       |                                                                                                                                                                                                                              |

| Study                                 | Country       | Time Period | Population               | Size             | Design                            | Case Identification                   | Case Definition                                                                                | Reported Incidence Rate/100,000 Person-years |             |               | Comments                                                                                                                                                                                                        |
|---------------------------------------|---------------|-------------|--------------------------|------------------|-----------------------------------|---------------------------------------|------------------------------------------------------------------------------------------------|----------------------------------------------|-------------|---------------|-----------------------------------------------------------------------------------------------------------------------------------------------------------------------------------------------------------------|
|                                       |               |             |                          |                  |                                   |                                       |                                                                                                | All (Trend)                                  | Men (Trend) | Women (Trend) |                                                                                                                                                                                                                 |
| Hawkins 2012 (CPRD 2007) <sup>5</sup> | UK            | 1999        | General Population       | 12,412 HF cases  | Retrospective longitudinal cohort | GP records                            | Clinical diagnosis codes                                                                       | 200                                          | -           | -             | The study presents stratification by socio-economic quintiles and incidence rates are standardised to the European Standard Population. Cases are identified based on primary, but not secondary, care records. |
|                                       |               | 2007        |                          | 13,330 HF cases  |                                   |                                       |                                                                                                | 60 (↓)                                       |             |               |                                                                                                                                                                                                                 |
| Cowie 1999 (Hillingdon) <sup>24</sup> | UK            | 1996        | General Population > 25y | 101,885 subjects | Prospective cohort                | GP and hospital referrals             | Clinical assessment, electrocardiography, chest radiography and transthoracic echocardiography | 130 (○)                                      | 140 (○)     | 120 (○)       | One of the first community-based heart failure incidence studies. The number of cases is comparatively small. This study does not report temporal trends within the cohort.                                     |
| Murphy 2004 (Scotland) <sup>25</sup>  | UK (Scotland) | 1999-2000   | General Population       | 307,741 subjects | Cross-sectional cohort            | GP records                            | Clinical diagnosis codes associated with a "first" modifier                                    | 200 (○)                                      | 180 (○)     | 220 (○)       | Cases are identified based on primary, but not secondary, care records. Age-standardised rates or temporal trends are not reported.                                                                             |
| Gomez-Soto 2011 (Spain) <sup>26</sup> | Spain         | 2000        | General Population >=14  | 267,231 subjects | Prospective cohort                | Diagnosis by GP or hospital admission | Framingham criteria                                                                            | 296                                          | 306         | 286           | The study reports crude rates. Age-standardised rates are not reported.                                                                                                                                         |
|                                       |               | 2007        |                          |                  |                                   |                                       |                                                                                                | 390 (↑)                                      | 400 (↑)     | 380 (↑)       |                                                                                                                                                                                                                 |

**Abbreviations:** Heart Failure (HF), General Practice (GP), United Kingdom (UK), United States of America (USA), European Society of Cardiology (ESC).

Trends: ←→ indicates stable trend, ↓ indicates declining trend, and ○ indicates trends are not reported

#### References:

- Levy D, Kenchaiah S, Larson MG, et al. Long-Term Trends in the Incidence of and Survival with Heart Failure. *N Engl J Med* 2002;347(18):1397–402.
- Roger VL, Weston SA, Redfield MM, et al. Trends in heart failure incidence and survival in a community-based population. *JAMA* 2004;292(3):344–50.
- Gerber Y, Weston S a, Redfield MM, et al. A contemporary appraisal of the heart failure epidemic in olmsted county, Minnesota, 2000 to 2010. *JAMA Intern Med* 2015;175(6):996–1004.
- Ezekowitz JA, Kaul P, Bakal JA, Quan H, McAlister FA. Trends in heart failure care: has the incident diagnosis of heart failure shifted from the hospital to the emergency department and outpatient clinics? *Eur J Heart Fail* 2011;13(2):142–7.
- Zarrinkoub R, Wettermark B, Wändell P, et al. The epidemiology of heart failure, based on data for 2.1 million inhabitants in Sweden. *Eur J Heart Fail* 2013;15(9):995–1002.
- Cowie MR, Wood DA, Coats AJS, et al. Incidence and aetiology of heart failure; a population-based study. *Eur Heart J* 1999;20(6).
- Murphy NF, Simpson CR, McAlister FA, et al. National survey of the prevalence, incidence, primary care burden, and treatment of heart failure in Scotland. *Heart* 2004;90(10):1129–36.
- Gomez-Soto FM, Andrey JL, Garcia-Egido AA, et al. Incidence and mortality of heart failure: A community-based study. *Int J Cardiol* 2011;151(1):40–5.

**Table S2:** Clinical codes used to identify patients with heart failure.

**A. ICD-10 codes** used to identify patients with heart failure in hospital discharge records.

| Code Type                   | Code  | Description                                                                                 | # Incident Cases (%) | HF Type | Comment |
|-----------------------------|-------|---------------------------------------------------------------------------------------------|----------------------|---------|---------|
| ICD                         | I50.0 | Congestive heart failure                                                                    | 22177 (23.83%)       | HF-UNS  | NHFA    |
| ICD                         | I50.1 | Left ventricular failure                                                                    | 20555 (22.08%)       | HF-UNS  | NHFA    |
| ICD                         | I50.9 | Heart failure, unspecified                                                                  | 7585 (8.15%)         | HF-UNS  | NHFA    |
| ICD                         | I42.0 | Dilated cardiomyopathy (Congestive cardiomyopathy)                                          | 657 (0.71%)          | HF-REF  | NHFA    |
| ICD                         | I42.9 | Cardiomyopathy, unspecified (Cardiomyopathy (primary))(secondary) NOS                       | 562 (0.6%)           | HF-UNS  | NHFA    |
| ICD                         | I11.0 | Hypertensive heart disease with (congestive) heart failure                                  | 430 (0.46%)          | HF-UNS  | NHFA    |
| ICD                         | I25.5 | Ischaemic cardiomyopathy                                                                    | 327 (0.35%)          | HF-REF  | NHFA    |
| ICD                         | I13.2 | Hypertensive heart and renal disease with both (congestive) heart failure and renal failure | 52 (0.06%)           | HF-UNS  |         |
| ICD                         | I13.0 | Hypertensive heart and renal disease with (congestive) heart failure                        | 25 (0.03%)           | HF-UNS  |         |
| <b>Total Incident Cases</b> |       |                                                                                             | <b>52,370</b>        |         |         |

**B. Read codes** used to identify patients with heart failure in general practice records.

| Code Type | Medcode | Read Code | Description                                                | # Incident Cases (%) | HF Type | Comment  |
|-----------|---------|-----------|------------------------------------------------------------|----------------------|---------|----------|
| READ      | 884     | G581.00   | Left ventricular failure                                   | 9353 (10.05%)        | HF-UNS  | QOF HF   |
| READ      | 2062    | G58..00   | Heart failure                                              | 7998 (8.59%)         | HF-UNS  | QOF HF   |
| READ      | 2906    | G580.11   | Congestive cardiac failure                                 | 6462 (6.94%)         | HF-UNS  | QOF HF   |
| READ      | 398     | G580.00   | Congestive heart failure                                   | 4874 (5.24%)         | HF-UNS  | QOF HF   |
| READ      | 8966    | G5yy900   | Left Ventricular Systolic Dysfunction                      | 1751 (1.88%)         | HF-REF  | QOF LVSD |
| READ      | 3204    | G55..00   | Cardiomyopathy                                             | 1284 (1.38%)         | HF-UNS  |          |
| READ      | 11284   | 585f.00   | Echocardiogram shows left ventricular systolic dysfunction | 1139 (1.22%)         | HF-REF  | QOF LVSD |
| READ      | 1223    | G58..11   | Cardiac failure                                            | 1088 (1.17%)         | HF-UNS  | QOF HF   |
| READ      | 5942    | G581.13   | Impaired left ventricular function                         | 919 (0.99%)          | HF-REF  | QOF HF   |
| READ      | 7251    | 33BA.00   | Impaired Left Ventricular Function                         | 852 (0.92%)          | HF-REF  |          |
| READ      | 9913    | 101..00   | Heart failure confirmed                                    | 746 (0.8%)           | HF-UNS  |          |



| Code Type | Medcode | Read Code | Description                                           | # Incident Cases (%) | HF Type | Comment  |
|-----------|---------|-----------|-------------------------------------------------------|----------------------|---------|----------|
| READ      | 12550   | G5yyA00   | Left Ventricular Diastolic dysfunction                | 471 (0.51%)          | HF-UNS  |          |
| READ      | 8010    | G551.00   | Hypertrophic obstructive cardiomyopathy               | 398 (0.43%)          | HF-REF  |          |
| READ      | 5695    | G41z.11   | Chronic cor pulmonale                                 | 390 (0.42%)          | HF-UNS  |          |
| READ      | 4024    | G58z.00   | Heart failure NOS                                     | 304 (0.33%)          | HF-UNS  | QOF HF   |
| READ      | 11351   | 585g.00   | Echo shows LVDD                                       | 291 (0.31%)          | HF-REF  |          |
| READ      | 7535    | G554400   | Primary dilated cardiomyopathy                        | 229 (0.25%)          | HF-REF  |          |
| READ      | 13189   | 662g.00   | New York Heart Association classification - class II  | 180 (0.19%)          | HF-UNS  | QOF HF   |
| READ      | 5255    | G581000   | Acute left ventricular failure                        | 170 (0.18%)          | HF-UNS  | QOF HF   |
| READ      | 10079   | G580.12   | Right heart failure                                   | 162 (0.17%)          | HF-UNS  | QOF HF   |
| READ      | 3499    | G554300   | Hypertrophic non-obstructive cardiomyopathy           | 152 (0.16%)          | HF-REF  |          |
| READ      | 16383   | 101..00   | Heart failure confirmed                               | 148 (0.16%)          | HF-UNS  |          |
| READ      | 9524    | G580.14   | Biventricular failure                                 | 120 (0.13%)          | HF-UNS  | QOF HF   |
| READ      | 7320    | G343.00   | Ischaemic cardiomyopathy                              | 113 (0.12%)          | HF-REF  |          |
| READ      | 17278   | G58z.12   | Cardiac failure NOS                                   | 100 (0.11%)          | HF-UNS  | QOF HF   |
| READ      | 19066   | 662h.00   | New York Heart Association classification - class III | 98 (0.11%)           | HF-UNS  | QOF HF   |
| READ      | 27964   | G582.00   | Acute heart failure                                   | 88 (0.09%)           | HF-UNS  | QOF HF   |
| READ      | 22993   | G55z.00   | Cardiomyopathy NOS                                    | 79 (0.08%)           | HF-UNS  |          |
| READ      | 107397  | G5yyD00   | Left ventricular cardiac dysfunction                  | 79 (0.08%)           | HF-REF  | QOF LVSD |
| READ      | 18853   | 662f.00   | NYHA class f - i                                      | 79 (0.08%)           | HF-UNS  | QOF HF   |
| READ      | 101138  | G583.00   | Heart failure with normal ejection fraction           | 71 (0.08%)           | HF-UNS  |          |
| READ      | 32671   | G580100   | Chronic congestive heart failure                      | 65 (0.07%)           | HF-UNS  | QOF HF   |
| READ      | 4915    | G555.00   | Alcoholic cardiomyopathy                              | 65 (0.07%)           | HF-REF  |          |
| READ      | 10154   | G580.13   | Right ventricular failure                             | 60 (0.06%)           | HF-UNS  | QOF HF   |
| READ      | 9402    | G55y.11   | Secondary dilated cardiomyopathy                      | 55 (0.06%)           | HF-REF  |          |
| READ      | 27884   | G580200   | Decompensated cardiac failure                         | 52 (0.06%)           | HF-UNS  | QOF HF   |
| READ      | 32898   | 8H2S.00   | Admit heart failure emergency                         | 26 (0.03%)           | HF-UNS  |          |
| READ      | 21852   | G554200   | Familial cardiomyopathy                               | 20 (0.02%)           | HF-UNS  |          |
| READ      | 106897  | G583.12   | Heart failure with preserved ejection fraction        | 18 (0.02%)           | HF-UNS  | QOF HF   |
| READ      | 104275  | G584.00   | Right ventricular failure                             | 17 (0.02%)           | HF-UNS  | QOF HF   |

| Code Type                   | Medcode | Read Code | Description                                                 | # Incident Cases (%) | HF Type | Comment |
|-----------------------------|---------|-----------|-------------------------------------------------------------|----------------------|---------|---------|
| READ                        | 5141    | G554000   | Congestive cardiomyopathy                                   | 16 (0.02%)           | HF-UNS  |         |
| READ                        | 11424   | G580300   | Compensated cardiac failure                                 | 16 (0.02%)           | HF-UNS  | QOF HF  |
| READ                        | 97780   | G559.00   | Arrhythmogenic right ventricular cardiomyopathy             | 16 (0.02%)           | HF-REF  |         |
| READ                        | 101137  | G583.11   | HFNEF - heart failure with normal ejection fraction         | 15 (0.02%)           | HF-UNS  | QOF HF  |
| READ                        | 106008  | 8CMW800   | Heart failure clinical pathway                              | 13 (0.01%)           | HF-UNS  |         |
| READ                        | 94870   | G580400   | Congestive heart failure due to valvular disease            | 12 (0.01%)           | HF-UNS  | QOF HF  |
| READ                        | 27683   | G558100   | Cardiomyopathy in myotonic dystrophy                        | 9 (0.01%)            | HF-UNS  |         |
| READ                        | 70648   | Gyu5M00   | [X]Other hypertrophic cardiomyopathy                        | 8 (0.01%)            | HF-REF  |         |
| READ                        | 22262   | G1yz100   | Rheumatic left ventricular failure                          | 7 (0.01%)            | HF-UNS  | QOF HF  |
| READ                        | 51214   | 662i.00   | New York Heart Association classification - class IV        | 7 (0.01%)            | HF-UNS  | QOF HF  |
| READ                        | 106198  | 661M500   | Heart failure self-management plan agreed                   | 7 (0.01%)            | HF-UNS  |         |
| READ                        | 103732  | 8CMK.00   | Has heart failure management plan                           | 4 (0%)               | HF-UNS  |         |
| READ                        | 62718   | G21z100   | Hypertensive heart disease NOS with CCF                     | 2 (0%)               | HF-UNS  |         |
| READ                        | 52127   | G211100   | Benign hypertensive heart disease with CCF                  | 2 (0%)               | HF-UNS  |         |
| READ                        | 21837   | G232.00   | Hypertensive heart&renal dis wth (congestive) heart failure | 2 (0%)               | HF-UNS  |         |
| READ                        | 105542  | 8CeC.00   | Preferred place of care for next exacerbation heart failure | 2 (0%)               | HF-UNS  |         |
| <b>Total Incident Cases</b> |         |           |                                                             | <b>40,704</b>        |         |         |

**Abbreviations:** 'HF-REF' refers to heart failure with reduced ejection fraction (highlighted in blue). 'HF-UNS' refers to heart failure with unspecified ejection fraction. 'NHFA' refers to codes used by the National Heart Failure Audit to identify patients with a heart failure diagnosis from hospital discharge records. 'QOF HF' refers to codes used by the 2014 'quality and outcomes framework' (QOF) to identify patients with a heart failure diagnosis from general practice records. 'QOF LVSD' refers to codes used by the 2014 QOF to identify patients with a left ventricular systolic dysfunction diagnosis from general practice records.

**Table S3:** Clinical codes used to exclude first heart failure diagnoses not referring to an acute event.

| <b>Code Type</b> | <b>Medcode</b> | <b>Readcode</b> | <b>Description</b>                                           |
|------------------|----------------|-----------------|--------------------------------------------------------------|
| READ             | 95021          | 9N4s.00         | Did not attend practice nurse heart failure clinic           |
| READ             | 24503          | 8B29.00         | Cardiac failure therapy                                      |
| READ             | 95835          | 679X.00         | Heart failure education                                      |
| READ             | 26115          | 8HHb.00         | Referral to heart failure nurse                              |
| READ             | 5155           | 23E1.00         | O/E - pulmonary oedema                                       |
| READ             | 90935          | 9hH..00         | Exception reporting: heart failure quality indicators        |
| READ             | 30749          | 9hH0.00         | Excepted heart failure quality indicators: Patient unsuitabl |
| READ             | 34213          | 9h1..00         | Exception reporting: LVD quality indicators                  |
| READ             | 11613          | 9h11.00         | Excepted from LVD quality indicators: Patient unsuitable     |
| READ             | 28649          | 9h12.00         | Excepted from LVD quality indicators: Informed dissent       |
| READ             | 15058          | 14A6.00         | H/O: heart failure                                           |
| READ             | 46912          | 14AM.00         | H/O: Heart failure in last year                              |
| READ             | 83502          | 662p.00         | Heart failure 6 month review                                 |
| READ             | 12366          | 662T.00         | Congestive heart failure monitoring                          |
| READ             | 30779          | 662W.00         | Heart failure annual review                                  |
| READ             | 32945          | 8CL3.00         | Heart failure care plan discussed with patient               |
| READ             | 17851          | 8HBE.00         | Heart failure follow-up                                      |
| READ             | 70619          | 8HHz.00         | Referral to heart failure exercise programme                 |
| READ             | 71235          | 8Hk0.00         | Referred to heart failure education group                    |
| READ             | 64062          | 9hH1.00         | Excepted heart failure quality indicators: Informed dissent  |
| READ             | 32911          | 9Or..00         | Heart failure monitoring administration                      |
| READ             | 19380          | 9Or0.00         | Heart failure review completed                               |
| READ             | 90193          | 9Or1.00         | Heart failure monitoring telephone invite                    |
| READ             | 90192          | 9Or2.00         | Heart failure monitoring verbal invite                       |
| READ             | 72965          | 9Or3.00         | Heart failure monitoring first letter                        |
| READ             | 72386          | 9Or4.00         | Heart failure monitoring second letter                       |
| READ             | 89650          | 9Or5.00         | Heart failure monitoring third letter                        |
| READ             | 18793          | 9On..00         | Left ventricular dysfunction monitoring administration       |

| <b>Code Type</b> | <b>Medcode</b> | <b>Readcode</b> | <b>Description</b>                                         |
|------------------|----------------|-----------------|------------------------------------------------------------|
| READ             | 60710          | 9On0.00         | Left ventricular dysfunction monitoring first letter       |
| READ             | 60721          | 9On1.00         | Left ventricular dysfunction monitoring second letter      |
| READ             | 72341          | 9On2.00         | Left ventricular dysfunction monitoring third letter       |
| READ             | 92305          | 9On3.00         | Left ventricular dysfunction monitoring verbal invite      |
| READ             | 96484          | 9On4.00         | Left ventricular dysfunction monitoring telephone invite   |
| READ             | 100784         | 2126400         | Heart Failure Resolved                                     |
| READ             | 102585         | 8HgD.00         | Discharge from heart failure nurse service                 |
| READ             | 106680         | 8HTL000         | Referral to rapid access heart failure clinic              |
| READ             | 106836         | 8IB8.00         | Referral to heart failure exercise programme not indicated |
| READ             | 106894         | 8IE1.00         | Referral to heart failure exercise programme declined      |
| READ             | 107981         | 8IE0.00         | Referral to heart failure education group declined         |
| READ             | 42999          | 12CR.00         | FH: Hypertrophic obstructive cardiomyopathy                |

**Figure S1:** Overall and age-stratified heart failure prevalence in 2002 versus 2014.

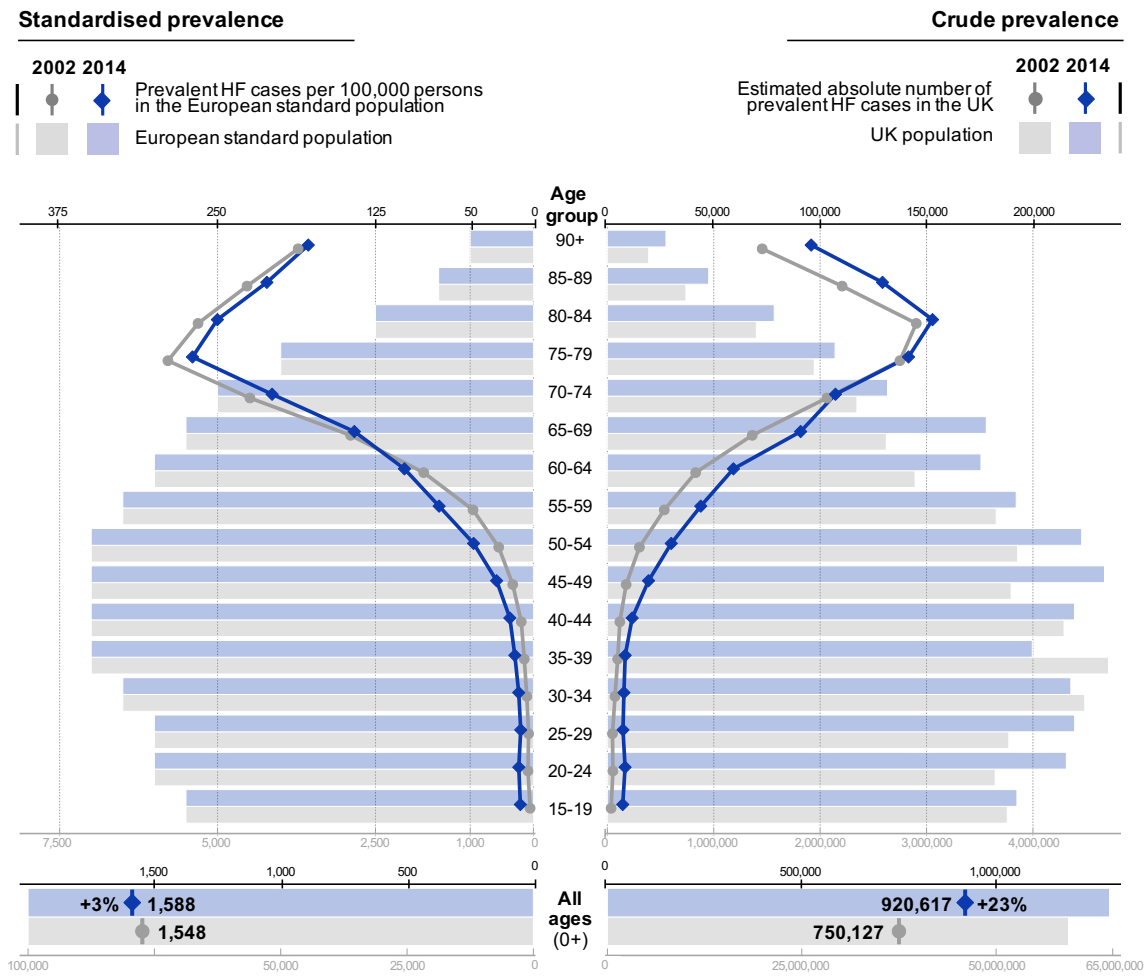

Standardised heart failure (HF) prevalence (left panel) presents cases in 100,000 persons from the European standard population. Crude prevalence (right panel) presents estimated number of cases in the United Kingdom (UK) population (census mid-year estimates) in 2002 and 2014.

**Figure S2:** Overall and age-stratified heart failure incidence for women and men.

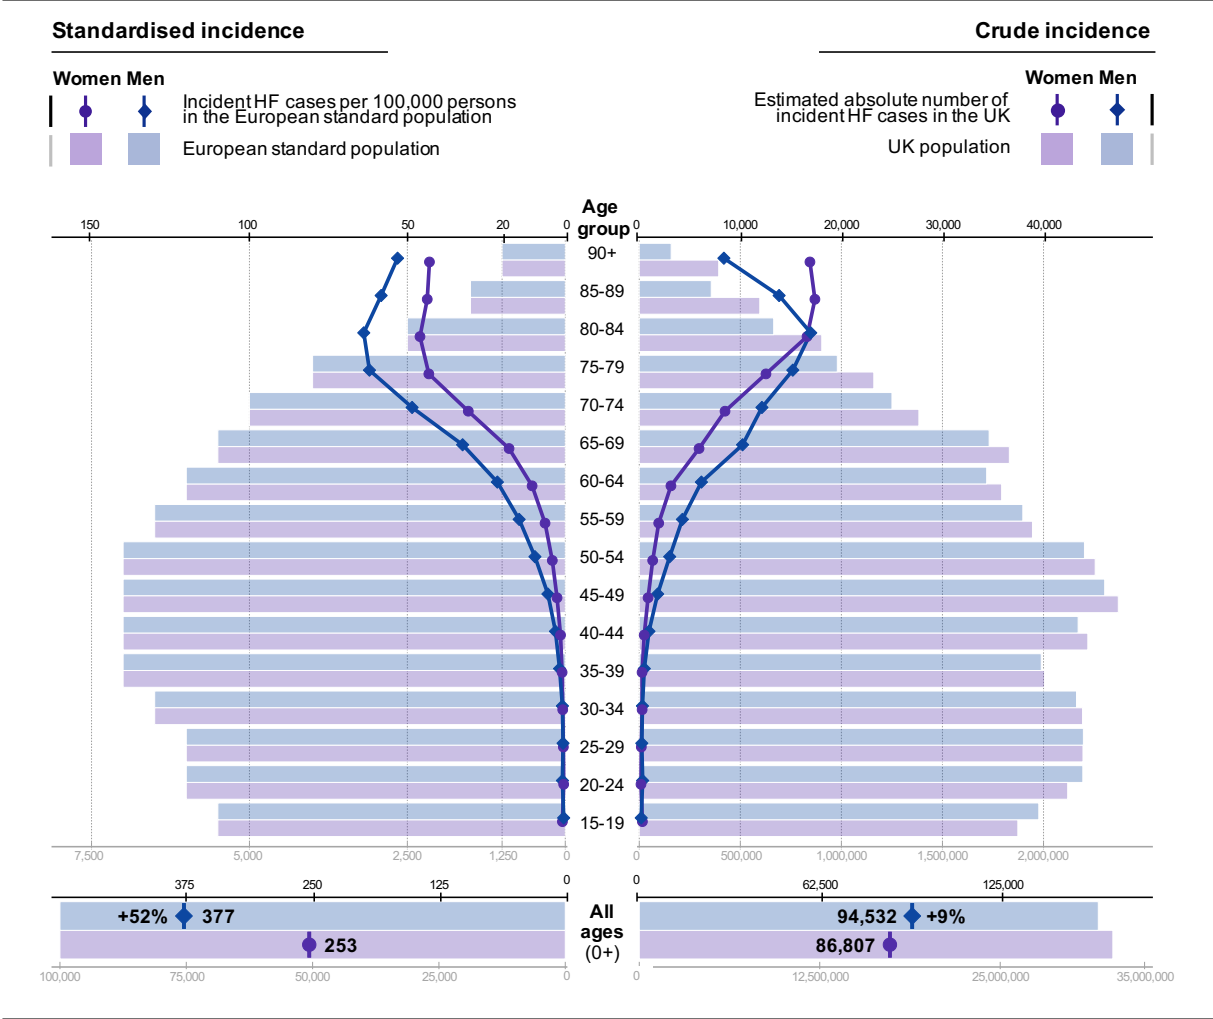

Standardised heart failure (HF) incidence (left panel) presents cases in 100,000 persons from the European standard population. Crude incidence (right panel) presents estimated absolute number of cases in the United Kingdom (UK) population (2014 census mid-year estimates). Incidence rates were calculated over all years from 2002 to 2014.

**Figure S3:** Age-sex-standardised heart failure incidence in England by regions in 2002 and 2014

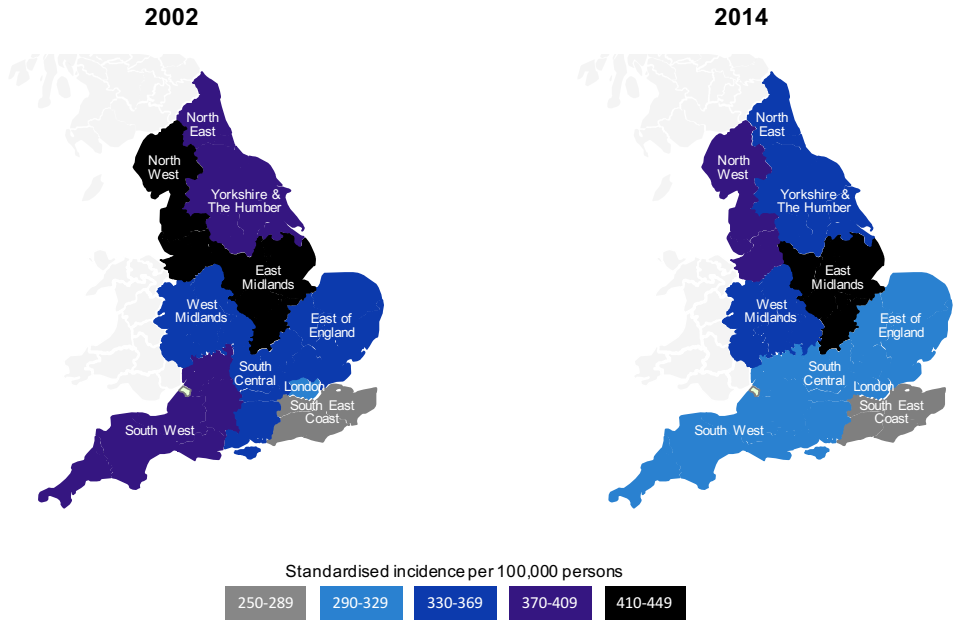

*Incidence rates are standardised to the European standard population. Geographical division refers to the information provided by Clinical Practice Research Datalink (CPRD).*
